# Supplementary material
Source: ML conference proceedings conference paper supplement (https://proceedings.mlr.press/v139/ustimenko21a.html)
Supplement: Supplementary file [file ustimenko21a-supp.pdf]

---

# SGLB: Stochastic Gradient Langevin Boosting

## Supplementary Materials

---

Aleksii Ustimenko   Liudmila Prokhorenkova

### A. Proof of Lemma 1

First, let us prove that  $\Phi_{s_\tau} = (H_{s_\tau}^T H_{s_\tau})^\dagger H_{s_\tau}^T$ .

We can rewrite Equation (3) from the main text as

$$\theta_*^{s_\tau} = \lim_{\delta \rightarrow 0} \arg \min_{\theta^{s_\tau}} \| -\epsilon \widehat{g}_\tau - H_{s_\tau} \theta^{s_\tau} \|_2^2 + \delta^2 \| \theta^{s_\tau} \|_2^2.$$

Taking the derivative of the inner expression, we obtain:

$$(H_{s_\tau}^T H_{s_\tau} + \delta^2 I_N) \theta^{s_\tau} - \epsilon H_{s_\tau}^T \widehat{g}_\tau = 0.$$

So,  $\Phi_{s_\tau}$  can be defined as  $\lim_{\delta \rightarrow 0} (H_{s_\tau}^T H_{s_\tau} + \delta^2 I_N)^{-1} H_{s_\tau}^T$ . Such limit is well defined and is known as the pseudo-inverse of the matrix (Gulliksson et al., 2000).

Let us now prove Lemma 1 from the main text.

The matrix  $P_{s_\tau}$  is symmetric since  $P_{s_\tau} = \lim_{\delta \rightarrow 0} H_{s_\tau} (H_{s_\tau}^T H_{s_\tau} + \delta^2 I_N)^{-1} H_{s_\tau}^T$ .

Observe that if  $H_{s_\tau} \theta^{s_\tau} = v$ , then  $P_{s_\tau} v = v$ , since the problem in Equation (3) of the main text has an exact solution for the arg min subproblem. As a result,  $\text{im} P_{s_\tau} = \text{im} H_{s_\tau}$ . Also, for an arbitrary  $v \in \mathbb{R}^N$ , we have  $P_{s_\tau} (P_{s_\tau} v) = P_{s_\tau} v$  since  $P_{s_\tau} v \in \text{im} H_{s_\tau}$ .

### B. CatBoost Implementation

We implemented SGLB as a part of the CatBoost gradient boosting library, which was shown to provide state-of-the-art results on many datasets (Prokhorenkova et al., 2018). Now we specify the particular tuple  $\mathcal{B} = (\mathcal{H}, p(s|g))$  such that all the required assumption are satisfied. Therefore, the implementation must converge globally for a wide range of functions, not only for convex ones.

Let us describe the weak learners set  $\mathcal{H}$  used by CatBoost. For each numerical feature, CatBoost chooses between a finite number of splits  $\mathbb{1}_{\{x_i \leq c_{ij}\}}$ , where  $\{c_{ij}\}_{j=1}^{d_i}$  are some constants typically picked as quantiles of  $x_i$  estimated on  $\mathcal{D}_N$  and  $d_i$  is bounded by a hyperparameter *border-count*. So, the set of weak learners  $\mathcal{H}$  consists of all non-trivial binary oblivious trees with splits  $\mathbb{1}_{\{x_i \leq c_{ij}\}}$  and with depth bounded by a hyperparameter *depth*. This set is finite,  $|S| < \infty$ . We take  $\theta^s \in \mathbb{R}^{m_s}$  as a vector of leaf values of the obtained tree.

Now we are going to describe  $p(s|g)$ . Assume that we are given a vector  $g \in \mathbb{R}^N$  and already built a tree up to a depth  $j$  with remaining (not used) binary candidate splits  $b_1, \dots, b_p$ . Each split, being added to the currently built tree, divides the vector  $g$  into components  $g_1 \in \mathbb{R}^{N_1}, \dots, g_k \in \mathbb{R}^{N_k}$ , where  $k = 2^{j+1}$ . To decide which split  $b_l$  to apply, CatBoost calculates the following statistics:

$$s_l := \sqrt{\sum_{i=1}^k \text{Var}(g_i)},$$

where  $\text{Var}(\cdot)$  is the variance of components from the component-wise mean. Denote also  $\sigma := \sqrt{\text{Var}(g)}$ . Then, CatBoost evaluates:

$$s'_l := \mathcal{N} \left( s_l, \left( \frac{\rho \sigma}{1 + N \epsilon \tau} \right)^2 \right),$$

where  $\rho \geq 0$  is a hyperparameter defined by the *random-strength* parameter. After obtaining  $s'_l$ , CatBoost selects the split with a highest  $s'_l$  value and adds it to the tree. Then, it proceeds recursively until a stopping criteria is met.

Since  $\epsilon \tau \rightarrow \infty$ , we can assume that the variance of  $s'_l$  equals zero in the limit. Thus, the stationarity of sampling is preserved. So,  $p(s|g)$  is fully specified, and one can show that it satisfies all the requirements. Henceforth, such CatBoost implementation  $\mathcal{B}$  must converge globally for a large class of losses as  $\epsilon \rightarrow 0_+, \epsilon \tau \rightarrow \infty$ .

### C. Experimental Setup

#### C.1. Dataset Description

The datasets are listed in Table 1.

#### C.2. Parameter Tuning

For all algorithms, we use the default value 64 for the parameter *border-count* and the default value 0 for *random-strength* ( $\rho \geq 0$ ).

For SGB, we tune *learning-rate* ( $\epsilon > 0$ ), *depth* (the maximal tree depth), and the regularization parameter *l2-leaf-reg*. Moreover, we set *bootstrap-type*=*Bernoulli*.

Table 1. Datasets description

| Dataset                          | # Examples | # Features |
|----------------------------------|------------|------------|
| Appetency (KDD, 2009)            | 50000      | 231        |
| Churn (KDD, 2009)                | 50000      | 231        |
| Upselling (KDD, 2009)            | 50000      | 231        |
| Adult (Kohavi and Becker, 1996)  | 48842      | 15         |
| Amazon (Kaggle, 2017)            | 32769      | 9          |
| Click (KDD, 2012)                | 399482     | 12         |
| Epsilon (PASCAL Challenge, 2008) | 500K       | 2000       |
| Higgs (Whiteson, 2014)           | 11M        | 28         |
| Internet (KDD, 1998)             | 10108      | 69         |
| Kick (Kaggle, 1998)              | 72983      | 36         |

For SGLB, we tune *learning-rate*, *depth*, *model-shrink-rate* ( $\gamma \geq 0$ ), and *diffusion-temperature* ( $\beta > 0$ ).

For all methods, we set *leaf-estimation-method*=*Gradient* as our main purpose is to compare first order optimization, and use the option *use-best-model*=*True*.

For tuning, we use the random search (200 samples) with the following distributions:

- For *learning-rate* log-uniform distribution over  $[10^{-5}, 1]$ .
- For *l2-leaf-reg* log-uniform distribution over  $[10^{-1}, 10^1]$  for SGB and *l2-leaf-reg*=0 for SGLB.
- For *depth* uniform distribution over  $\{6, 7, 8, 9, 10\}$ .
- For *subsample* uniform distribution over  $[0, 1]$ .
- For *model-shrink-rate* log-uniform distribution over  $[10^{-5}, 10^{-2}]$  for SGLB.
- For *diffusion-temperature* log-uniform distribution over  $[10^2, 10^5]$  for SGLB.

## References

- M. E. Gulliksson, P.-Å. Wedin, and Yimin Wei. 2000. Perturbation Identities for Regularized Tikhonov Inverses and Weighted Pseudoinverses. *BIT Numerical Mathematics* 40, 3 (2000), 513–523.
- Kaggle. 1998. Don’t Get Kicked! <https://www.kaggle.com/c/DontGetKicked>. (1998).
- Kaggle. 2017. Amazon dataset. <https://www.kaggle.com/bittlingmayer/amazonreviews>. (2017).
- KDD. 1998. KDD Internet Usage Data. <https://www.kdd.org/kdd-cup/view/kdd-cup-2012-track-2>. (1998).
- KDD. 2009. KDD Cup 2009: Customer relationship prediction. <https://www.kdd.org/kdd-cup/view/kdd-cup-2009/Data>. (2009).
- KDD. 2012. KDD Cup 2012 (Track 2): Predict the click-through rate of ads given the query and user information. <https://www.kdd.org/kdd-cup/view/kdd-cup-2012-track-2>. (2012).
- Ronny Kohavi and Barry Becker. 1996. Adult dataset. <https://archive.ics.uci.edu/ml/datasets/Adult>. (1996).
- PASCAL Challenge. 2008. Epsilon dataset. <https://www.csie.ntu.edu.tw/~cjlin/libsvmtools/datasets/binary.html#epsilon>. (2008).
- Liudmila Prokhorenkova, Gleb Gusev, Aleksandr Vorobev, Anna Veronika Dorogush, and Andrey Gulin. 2018. CatBoost: unbiased boosting with categorical features. In *Advances in Neural Information Processing Systems*. 6638–6648.
- Daniel Whiteson. 2014. Higgs dataset. <https://archive.ics.uci.edu/ml/datasets/HIGGS>. (2014).

Table 2. Notation used throughout the paper

| Variable                                                              | Description                                                             |
|-----------------------------------------------------------------------|-------------------------------------------------------------------------|
| $x \in \mathcal{X}$                                                   | Features, typically from $\mathbb{R}^k$                                 |
| $y \in \mathcal{Y}$                                                   | Target, typically from $\mathbb{R}$ or $\{0, 1\}$                       |
| $z \in \mathcal{Z}$                                                   | Prediction, typically from $\mathbb{R}$                                 |
| $\mathcal{D}$                                                         | Data distribution over $\mathcal{X} \times \mathcal{Y}$                 |
| $\mathcal{D}_N = \{(x_i, y_i)\}_{i=1}^N$                              | I.i.d. samples from $\mathcal{D}$                                       |
| $L(z, y) : \mathcal{Z} \times \mathcal{Y} \rightarrow \mathbb{R}$     | Loss function                                                           |
| $\mathcal{L}(f \mathcal{D})$                                          | Expected loss w.r.t. $\mathcal{D}$                                      |
| $\mathcal{L}_N(f)$                                                    | Empirical loss                                                          |
| $\mathcal{L}_N(F, \gamma)$                                            | Regularized or implicitly regularized loss                              |
| $\mathcal{H}$                                                         | Set of weak learners                                                    |
| $h^s(x, \theta^s) \in \mathcal{H}$                                    | Weak learner parameterized by $\theta^s$                                |
| $H_s : \mathbb{R}^{m_s} \rightarrow \mathbb{R}^N$                     | Linear operator converting $\theta^s$ to $(h^s(x_i, \theta^s))_{i=1}^N$ |
| $\Theta \in \mathbb{R}^m$                                             | Ensemble parameters                                                     |
| $f_\Theta(x) : \mathcal{X} \rightarrow \mathcal{Z}$                   | Model parametrized by $\Theta \in \mathbb{R}^m$                         |
| $\tau \in \mathbb{Z}_+$                                               | Discrete time                                                           |
| $t \in [0, \infty)$                                                   | Continuous time                                                         |
| $\hat{F}_\tau$                                                        | Predictions' Markov Chain $(f_{\hat{\Theta}_\tau}(x_i))_{i=1}^N$        |
| $F(t)$                                                                | Markov process $(f_{\Theta(t)}(x_i))_{i=1}^N$                           |
| $V_B \subset \mathbb{R}^N$                                            | Subspace of predictions of all possible ensembles                       |
| $p(s g)$                                                              | Probability distribution over weak learners' indices                    |
| $\Phi_s : \mathbb{R}^N \rightarrow \mathbb{R}^{m_s}$                  | Weak learner parameters estimator                                       |
| $P_s := H_s \Phi_s$                                                   | Orthoprojector                                                          |
| $P_\infty = N \mathbb{E}_{s \sim p(s \mathbb{0}_N)} P_s$              | Implicit limiting preconditioner matrix of the boosting                 |
| $P = P_\infty$                                                        | Symmetric preconditioner matrix                                         |
| $\Gamma = \sqrt{P^{-1}}$                                              | Regularization matrix                                                   |
| $\delta_\Gamma(\gamma)$                                               | Error from the regularization                                           |
| $p_\beta(\Theta)$                                                     | Limiting distribution of $\hat{\Theta}_\tau$                            |
| $\lambda_*$                                                           | Uniform spectral gap parameter                                          |
| $\epsilon > 0$                                                        | Learning rate                                                           |
| $\beta > 0$                                                           | Inverse diffusion temperature                                           |
| $\gamma > 0$                                                          | Regularization parameter                                                |
| $I_m \in \mathbb{R}^{m \times m}$                                     | Identity matrix                                                         |
| $\mathbb{0}_m \in \mathbb{R}^m$                                       | Zero vector                                                             |
| $W(t)$                                                                | Standard Wiener process                                                 |
| $\phi(x) : \mathcal{X} \rightarrow \mathbb{R}^m$                      | Feature map, s.t. $f_\Theta(x) = \langle \phi(x), \Theta \rangle_2$     |
| $\Psi := [\phi(x_1), \dots, \phi(x_N)]^T \in \mathbb{R}^{N \times m}$ | Design matrix                                                           |
